# Supplementary material
Source: PubMed Central journal article supplement (PMC2739680)
Supplement: NIHMS126530-supplement-Supp_Fig_S2.pdf [file NIHMS126530-supplement-Supp_Fig_S2.pdf]

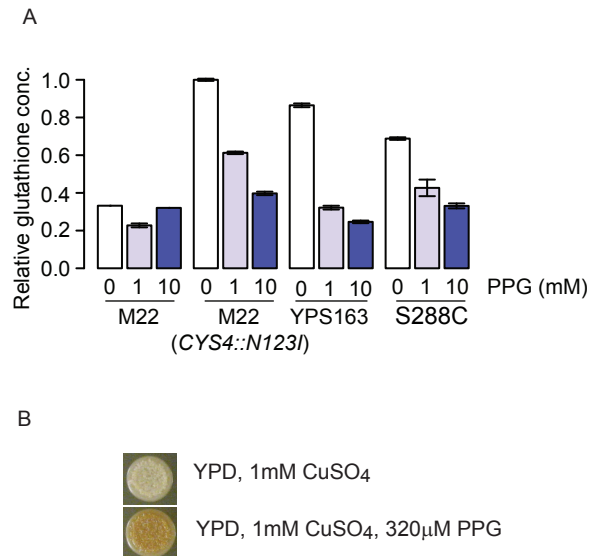

Fig. S2. Propargylglycine (PPG) inhibits glutathione biosynthesis and causes rust coloration. PPG decreases glutathione levels in M22-*CYS4::N123I*, YPS163 and S288c to the level found in M22 (A). PPG causes rust coloration in the presence of copper sulfate for BY4743, the strain in which the deletion collection was constructed (B). Total intracellular glutathione was measured as described in Kim and Fay [Kim HS & Fay JC (2007) Genetic variation in the cysteine biosynthesis pathway causes sensitivity to pharmacological compounds. *P Natl Acad Sci USA* **104**: 19387-19391].
