# Supplementary material
Source: PubMed Central journal article supplement (PMC2739680)
Supplement: NIHMS126530-supplement-Supp_Fig_S3.pdf [file NIHMS126530-supplement-Supp_Fig_S3.pdf]

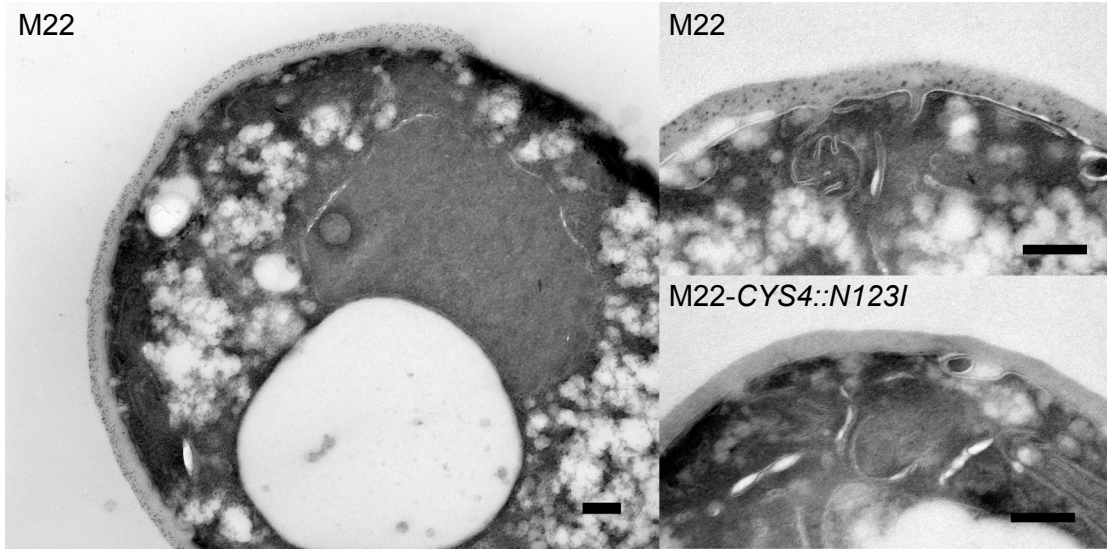

Fig. S3. Electron micrographs show dark granules at the cell surface in M22 but not M22-CYS4::N123I. Scale bar for each image is 250nm.
