# Supplementary material
Source: PubMed Central journal article supplement (PMC2739680)
Supplement: NIHMS126530-supplement-Supp_Fig_S4.pdf [file NIHMS126530-supplement-Supp_Fig_S4.pdf]

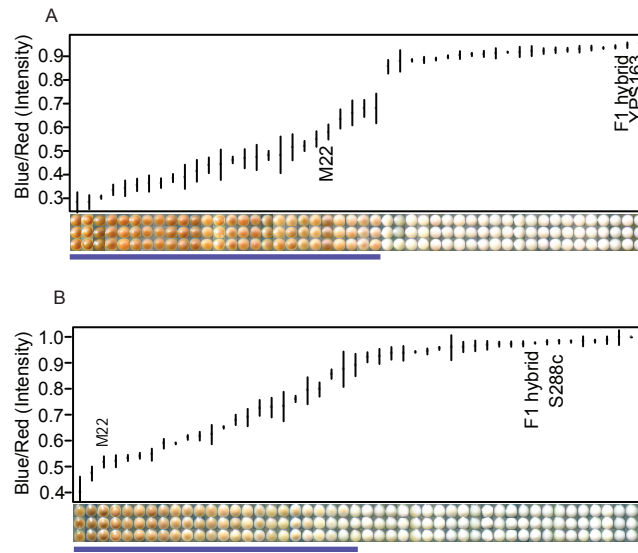

Fig. S4. The phenotypic distribution of homozygous recombinant strains generated from a cross of M22 to YPS163 (A) and M22 to S288c (B). Rust coloration was quantified by the ratio of blue to red intensities from photographs of three colonies of each strain grown on rich medium with 1mM copper sulfate, shown at the bottom. Points and bars indicate means and standard errors of rust coloration. The purple bar indicates strains containing the M22 allele of *CYS4*.
