# Supplementary material
Source: PubMed Central journal article supplement (PMC2739680)
Supplement: NIHMS126530-supplement-Supp_Fig_S5.pdf [file NIHMS126530-supplement-Supp_Fig_S5.pdf]

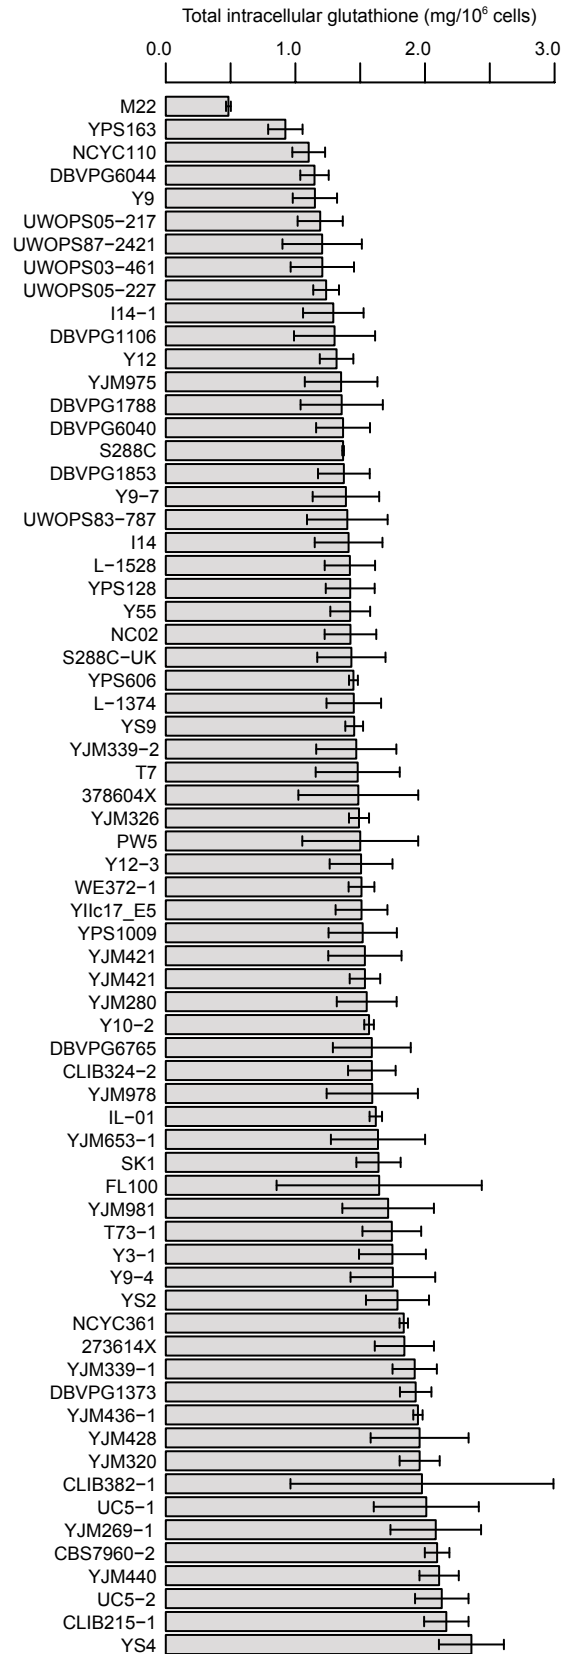

Fig. S5. Variation in intracellular glutathione concentration among natural yeast isolates. The total intracellular glutathione concentration was measured for 68 natural yeast isolates as described in Kim and Fay [Kim HS & Fay JC (2007) Genetic variation in the cysteine biosynthesis pathway causes sensitivity to pharmacological compounds. *P Natl Acad Sci USA* **104**: 19387-19391].
